# Supplementary material
Source: PubMed Central journal article supplement (PMC6892583)
Supplement: NIHMS1543682-supplement-2.pdf [file NIHMS1543682-supplement-2.pdf]

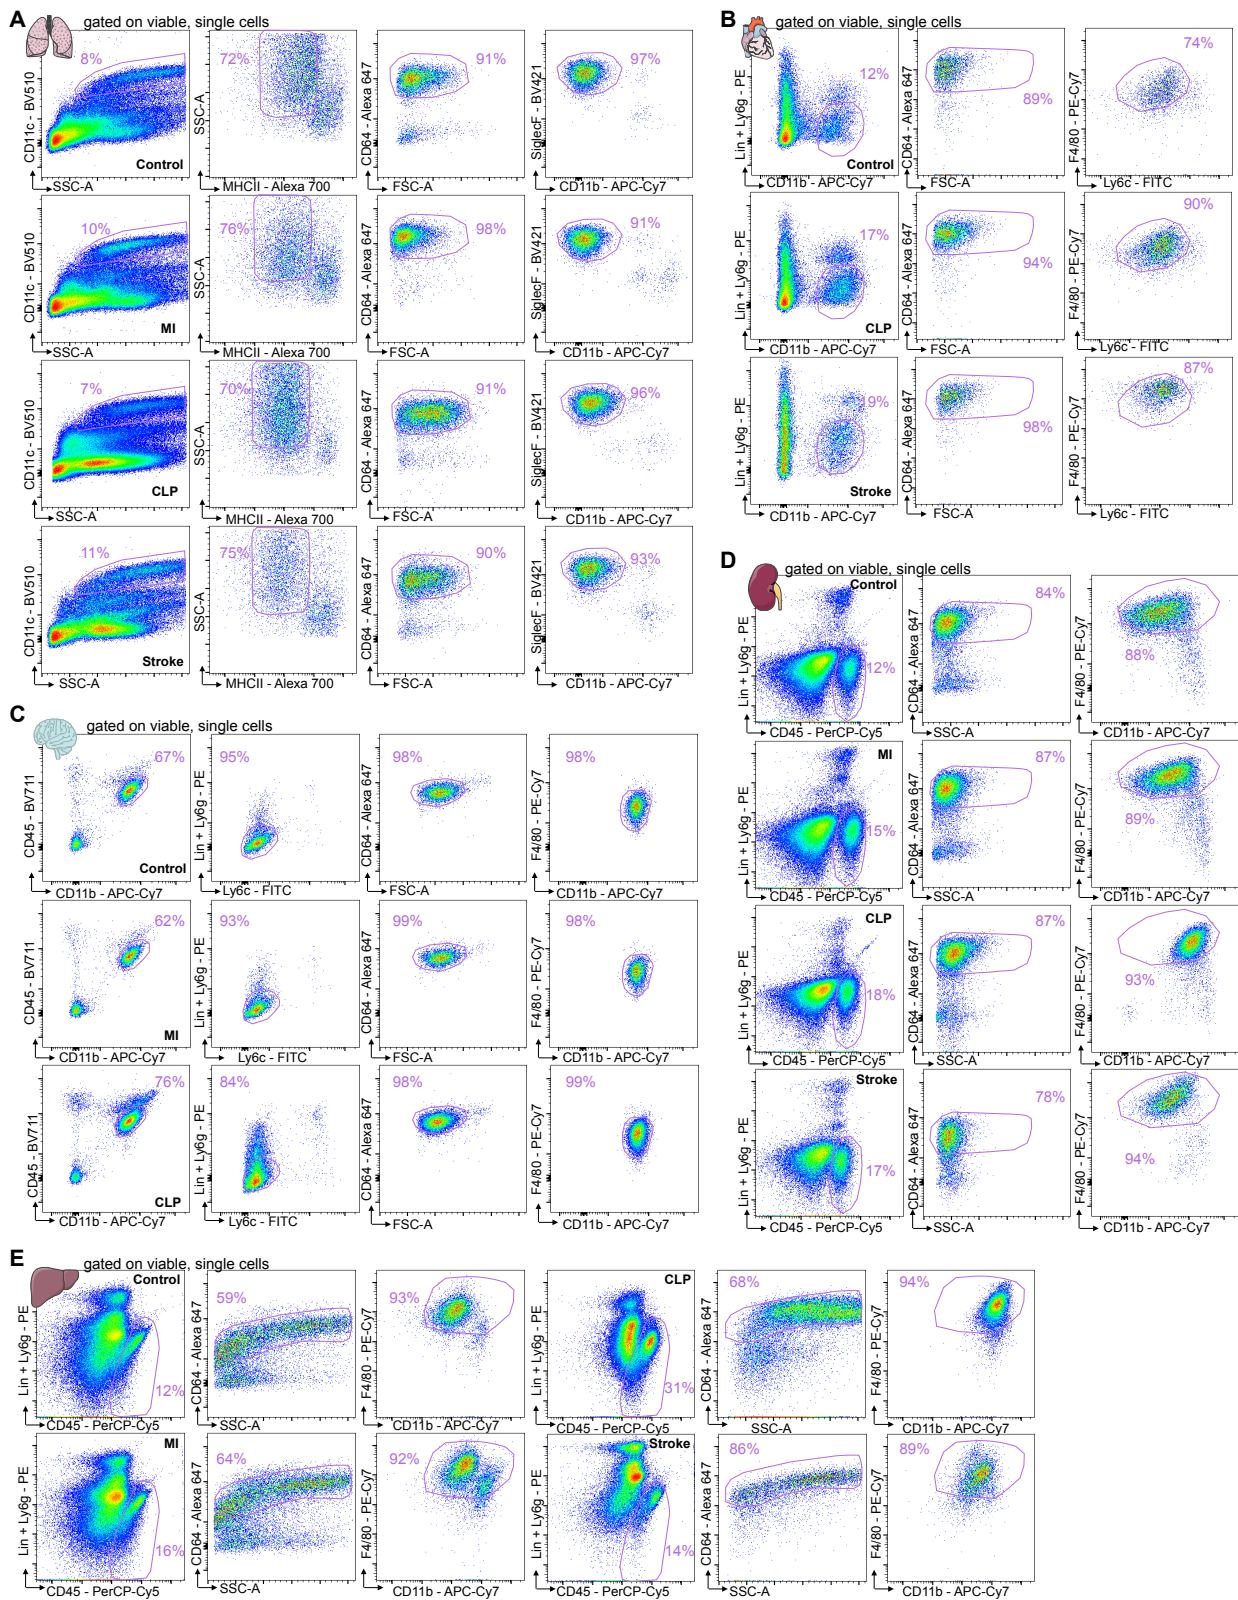

**Figure S1. Flow cytometry gating strategy for all organs and conditions, Related to Figure 1-4.**

Gating for macrophages in (A) lung, (B) heart, (C) brain, (D) kidney and (E) liver followed the Immgen guidelines whenever available. By design, the gates include both, resident and newly recruited macrophages.

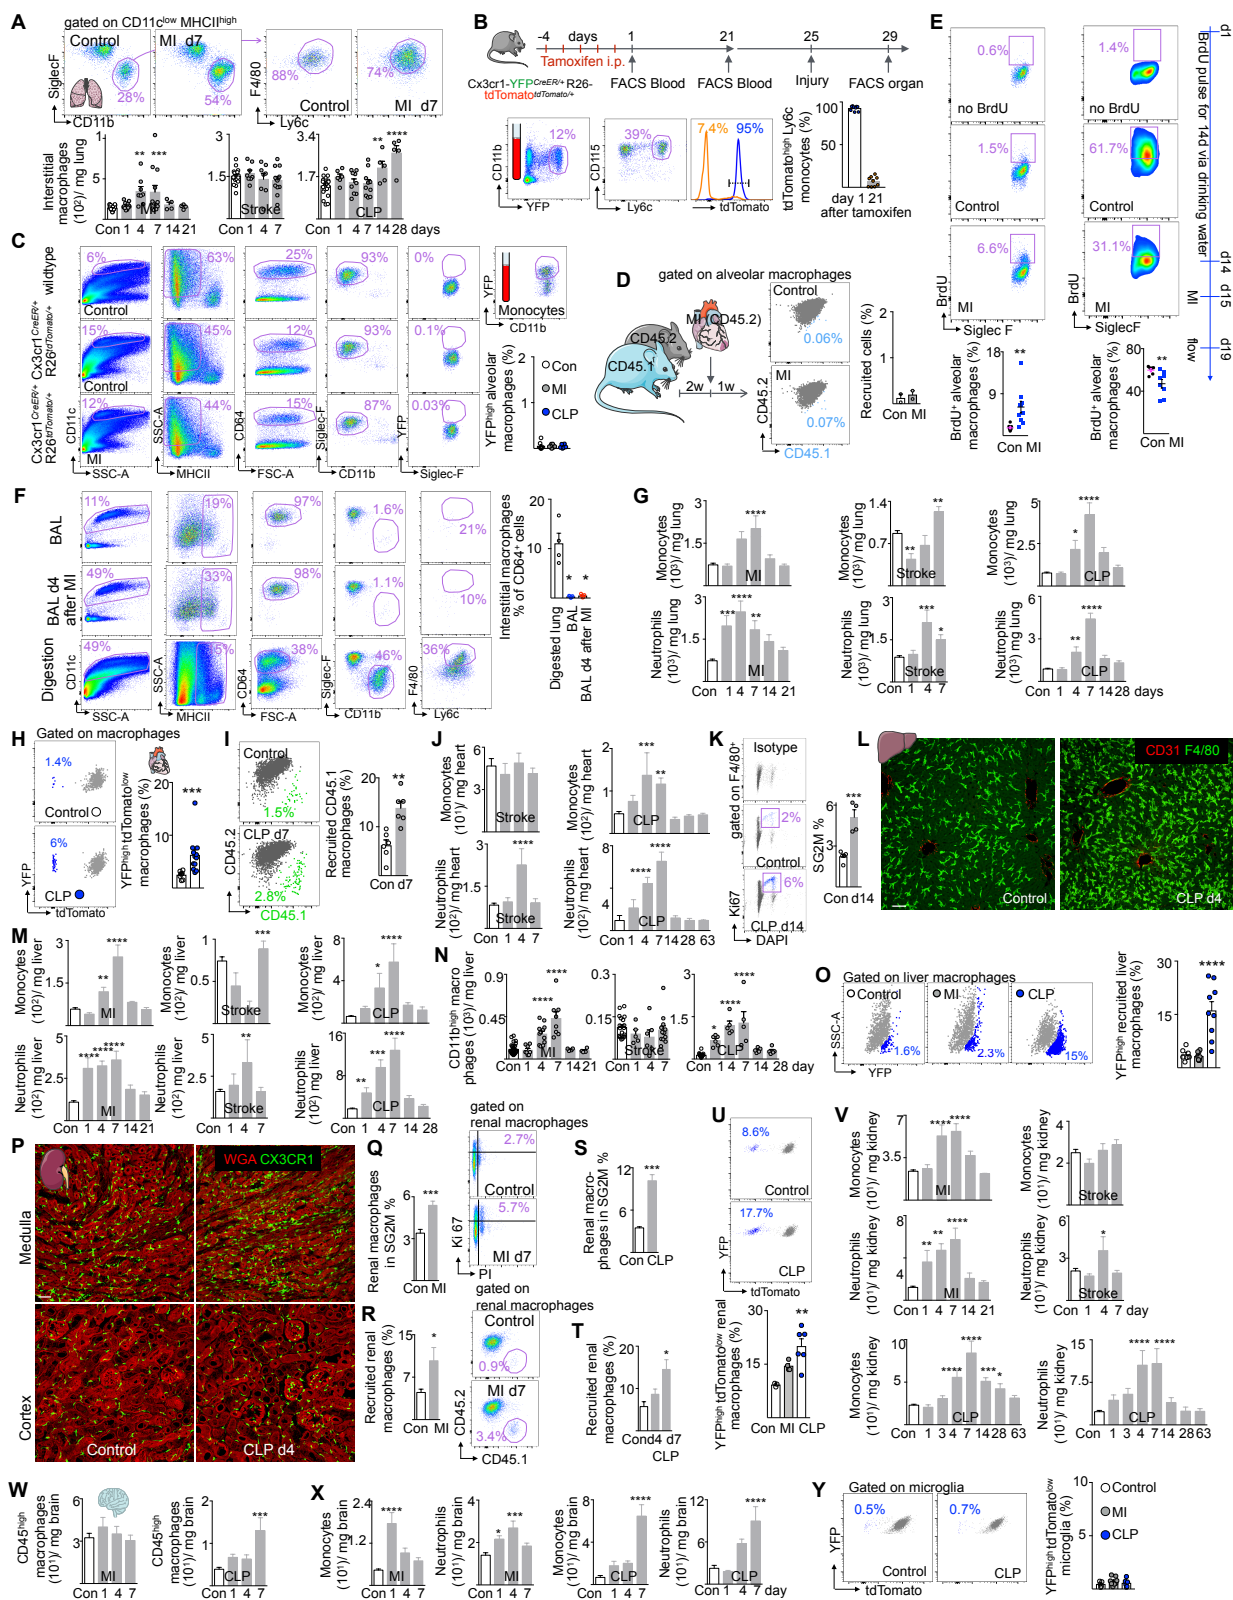

**Figure S2. Myeloid cells and macrophage fate mapping after remote injury in the lung, heart, liver and kidney, Related to Figure 1.**

(A) Interstitial macrophages after injury. Control  $n=19-28$ , MI  $n=4-12$ , stroke  $n=8-13$ , CLP  $n=5-10$  biological replicates. (B) Fate mapping in  $Cx3cr1^{CreER/+}R26^{tdTomato/+}$  mice and quantification of fluorescent proteins in blood monocytes, day 1  $n=9$ , day 21  $n=9$ . (C) Fate mapping for alveolar macrophages in  $Cx3cr1^{CreER/+}R26^{tdTomato/+}$  mice after MI and CLP and naive  $Cx3cr1^{CreER/+}R26^{tdTomato/+}$  controls. Control  $n=8$ , MI  $n=10$ , CLP  $n=6$  biological replicates. (D) Fate mapping experiments for alveolar macrophages in CD45.1/2 parabionts. MI was induced in DC45.2 mouse, whose lung was then investigated. MI  $n=2$  pairs, naive control  $n=2$  pairs. (E) Proliferation of alveolar macrophages by BrdU flow cytometry. Left: BrdU was injected i.p. three hours before sacrifice,  $n=8-10$ . Right: BrdU pulse chase experiment,  $n=6-8$ . (F) FACS of bronchoalveolar lavage (BAL) in naive controls and day 4 after MI. Naive controls (digested)  $n=4$ , controls BAL  $n=5$ , MI  $n=5$  biological replicates. (G) Lung monocytes and neutrophils after MI,  $n=4-30$ ; after stroke,  $n=8-19$ ; and after CLP,  $n=5-21$  biological replicates. (H) Fate mapping for cardiac macrophages in  $Cx3cr1^{CreER/+}R26^{tdTomato/+}$  mice after CLP and naive  $Cx3cr1^{CreER/+}R26^{tdTomato/+}$  controls. Control  $n=8$ , CLP  $n=12$  biological replicates. (I) Fate mapping for cardiac macrophages in CD45.1/2 parabionts after CLP. MI  $n=6$  pairs, naive control  $n=6$  pairs. (J) Cardiac monocytes and neutrophils after stroke,  $n=4-18$  biological replicates per time point; and after CLP,  $n=5-20$ . (K) Cell cycle analysis of cardiac macrophages after CLP, naive control  $n=5$ , CLP  $n=4$  biological replicates. (L) Fluorescence images of hepatic macrophages at baseline and 4 days after CLP. Scale bar, 50  $\mu\text{m}$ . (M) Hepatic monocytes and neutrophils after MI,  $n=4-31$ ; after stroke,  $n=5-19$ ; and after CLP,  $n=5-16$ . (N) Hepatic CD11b<sup>high</sup> macrophages, control  $n=16-32$ , MI  $n=4-12$ , stroke  $n=5-13$ , CLP  $n=5-6$  biological replicates. (O) Fate mapping for hepatic macrophages in  $Cx3cr1^{CreER/+}R26^{tdTomato/+}$  mice after CLP or MI and naive  $Cx3cr1^{CreER/+}R26^{tdTomato/+}$  controls. Control  $n=7$ , MI  $n=9$ , CLP  $n=9$  biological replicates. (P) Histology of renal macrophages after CLP, Scale bar, 50  $\mu\text{m}$ . (Q) Proliferation of renal macrophages by Ki-67 and Propidium iodide (PI) flow cytometry on d7 after MI,  $n=7-12$ . (R) Recruitment of renal macrophages after MI assessed by parabiosis,  $n=5-8$ . (S) Cell cycle analysis in renal macrophage on d7 after CLP,  $n=4-6$  biological replicates. (T) Recruitment of renal macrophages after CLP assessed by parabiosis,  $n=10-11$ ; and (U) after MI and CLP in  $Cx3cr1^{CreER/+}R26^{tdTomato/+}$  mice,  $n=3-6$ . (V) Renal monocytes and neutrophils after MI,  $n=4-34$ ; after stroke,  $n=4-16$ ; and after CLP,  $n=5-29$ . (W) Brain CD45<sup>high</sup> macrophages after MI and CLP,  $n=8-14$  biological replicates per time point. (X) Monocytes and neutrophils in the brain after MI,  $n=8$  and after CLP,  $n=8-14$ . (Y) Fate mapping for microglia in  $Cx3cr1^{CreER/+}R26^{tdTomato/+}$  mice after CLP, after MI and in naive  $Cx3cr1^{CreER/+}R26^{tdTomato/+}$  controls. Control  $n=5$ , MI  $n=8$ , CLP  $n=6$  biological replicates. Data are mean  $\pm$  s.e.m. \* $P<0.05$ , \*\* $P<0.01$ , \*\*\* $P<0.001$ , \*\*\*\* $P<0.0001$ . One-way ANOVA with Dunnett's multiple comparison test was applied for normally distributed data.



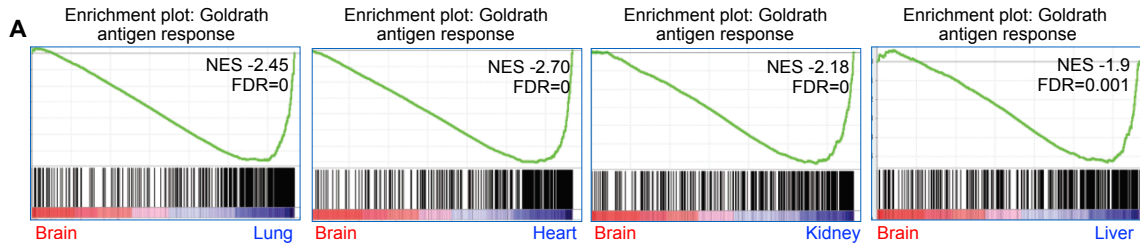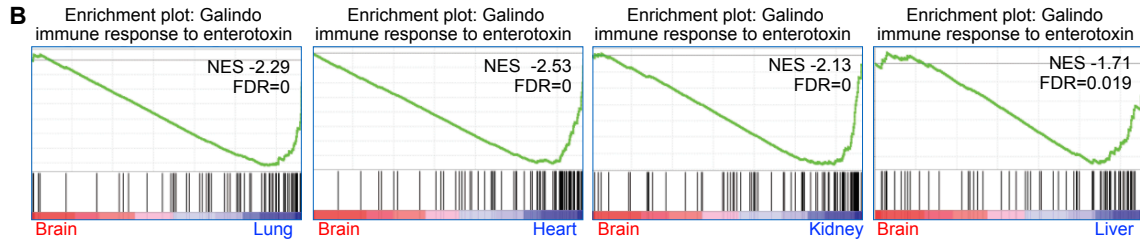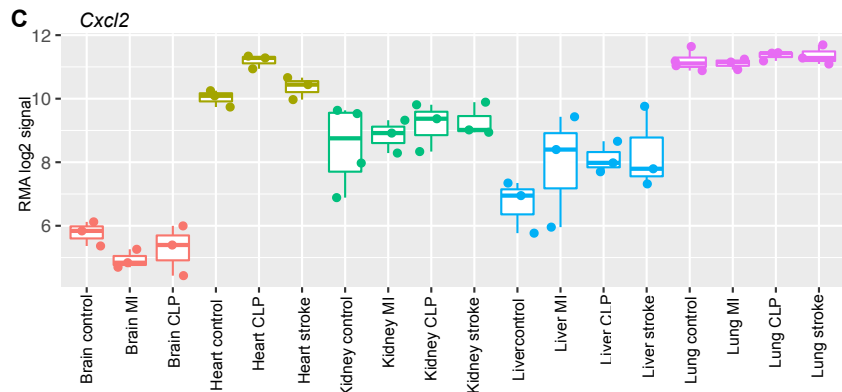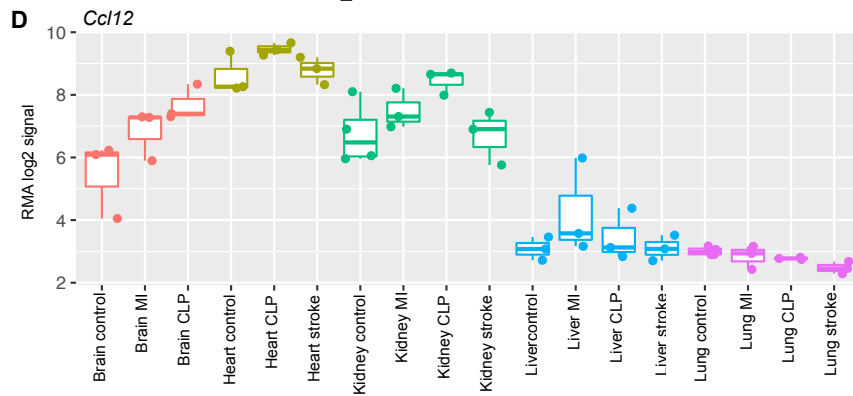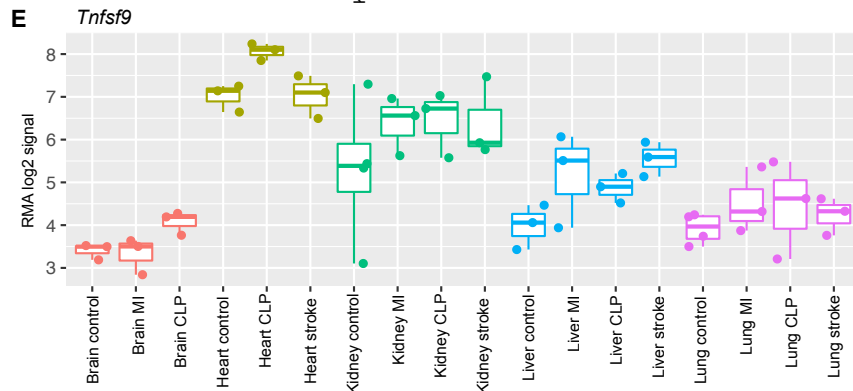

**Figure S3. Organ specific macrophage expression changes after injury, Related to Figure 2 and 3.**

(A) Gene set enrichment analysis of the gene set "GOLDRATH\_ANTIGEN\_RESPONSE" in brain microglia vs. all other organs. FDRs are calculated by gene set permutation. (B) Gene set enrichment analysis of the gene set "GALINDO\_IMMUNE\_RESPONSE\_TO\_ENTEROTOXIN" in brain microglia vs. all other organs. (C) Expression (RMA log<sub>2</sub> signal) of *Cxcl2*, (D) *Ccl12*, (E) *Tnfsf9* across the entire data set.

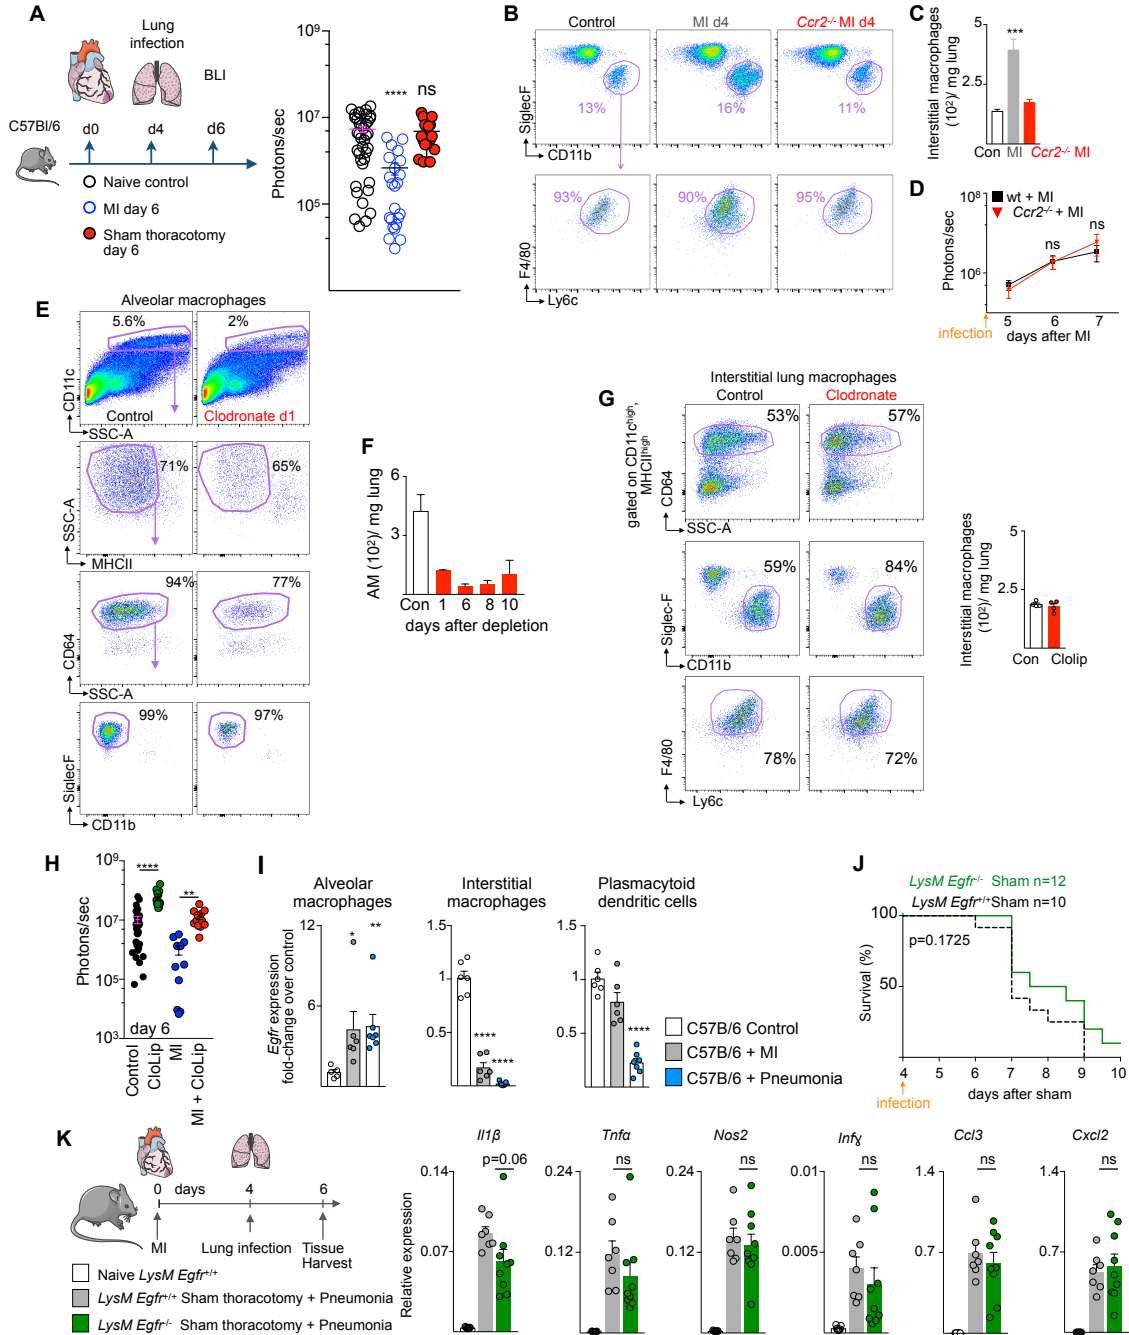

**Figure S4. Alveolar macrophages after MI, Related to Figure 5.**

(A) Bioluminescence signal 2 days after instillation of bioluminescent bacteria in naive controls, on day 6 after MI and day 6 after sham thoracotomy surgery. Control  $n=39$ , MI  $n=23$ , sham thoracotomy  $n=18$ . (B) Flow plots of lung interstitial macrophages in wildtype and *Ccr2*<sup>-/-</sup> mice after MI. (C) Quantification of lung interstitial macrophages in wildtype and *Ccr2*<sup>-/-</sup> mice after MI,  $n=4-5$ . (D) *Ccr2*<sup>-/-</sup> mice were subjected to MI and received bioluminescent streptococcus 4 days later,  $n=8-15$ . (E) Alveolar macrophages were depleted via intra-tracheal instillation of clodronate liposome. Flow plots shows macrophages in naive control and after liposome treatment. (F) Quantification of alveolar macrophages over time after clodronate depletion,  $n=2-4$  biological replicates per time point. (G) Flow cytometry for interstitial lung macrophages after intratracheal clodronate liposome instillation. Con  $n=4$ , Clolip  $n=4$  biological replicates. (H) Bioluminescence signal 2 days after instillation of bioluminescent bacteria in naive controls, controls that received intratracheal clodronate liposomes, and on day 6 after MI with and without intratracheal clodronate. Naive control  $n=27$ , control with clodronate  $n=12$ , MI  $n=11$ , MI with clodronate  $n=12$ . (I) Expression of *Egfr* in flow sorted alveolar macrophages, interstitial lung macrophages and plasmacytoid dendritic cells. Naive control  $n=5-6$  biological replicates, MI  $n=6$ , Pneumonia  $n=6$ . (J) Survival analysis in mice with sham thoracotomy. Sham *LysM Egfr*<sup>-/-</sup>  $n=12$ , *LysM Egfr*<sup>+/+</sup>  $n=12$ . (K) Gene expression in lung tissue harvested from mice that underwent sham thoracotomy control procedures and induction of pneumonia. Naive *LysM Egfr*<sup>+/+</sup>  $n=x$ , Sham *LysM Egfr*<sup>-/-</sup>  $n=8$ , *LysM Egfr*<sup>+/+</sup>  $n=7$ . Data are mean  $\pm$  s.e.m. \* $P<0.05$ , \*\* $P<0.01$ , \*\*\* $P<0.001$ , \*\*\*\* $P<0.0001$ . Unpaired t-test or ordinary one-way ANOVA with Dunnett's multiple comparison test was used for analysis.

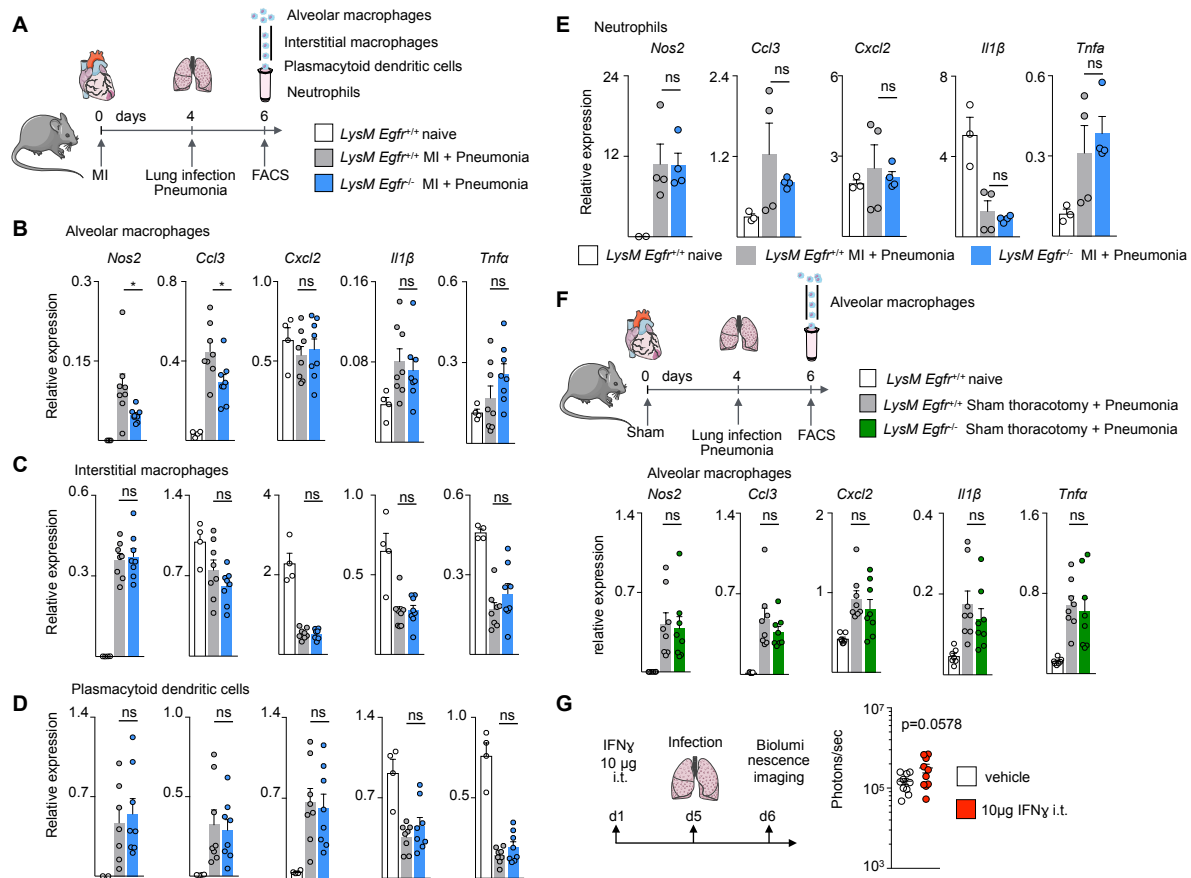

**Figure S5. Gene expression changes in lung and heart macrophages, Related to Figure 5.** (A) Experimental outline. (B) Gene expression in alveolar macrophages, (C) interstitial lung macrophages, (D) plasmacytoid dendritic cells, (E) neutrophils in naive *LysM Egfr*<sup>+/+</sup> *n*=2-4, *LysM Egfr*<sup>+/+</sup> with MI and pneumonia *n*=4-8, *LysM Egfr*<sup>-/-</sup> with MI and pneumonia *n*=4-8 biological replicates. (F) Gene expression in alveolar macrophages after sham thoracotomy control procedure and pneumonia. *LysM Egfr*<sup>+/+</sup> naive *n*=4, *LysM Egfr*<sup>+/+</sup> Sham thoracotomy + Pneumonia *n*=4-8, *LysM Egfr*<sup>-/-</sup> Sham thoracotomy + Pneumonia *n*=4-8 biological replicates. (G) Bioluminescence imaging after 10 $\mu$ g of intratracheal IFN $\gamma$  and intratracheal streptococcus pneumoniae instillation. Data are mean  $\pm$  s.e.m. \**P*<0.05. Unpaired t-test or ordinary one-way ANOVA with Dunnett's multiple comparison test was used for analysis.



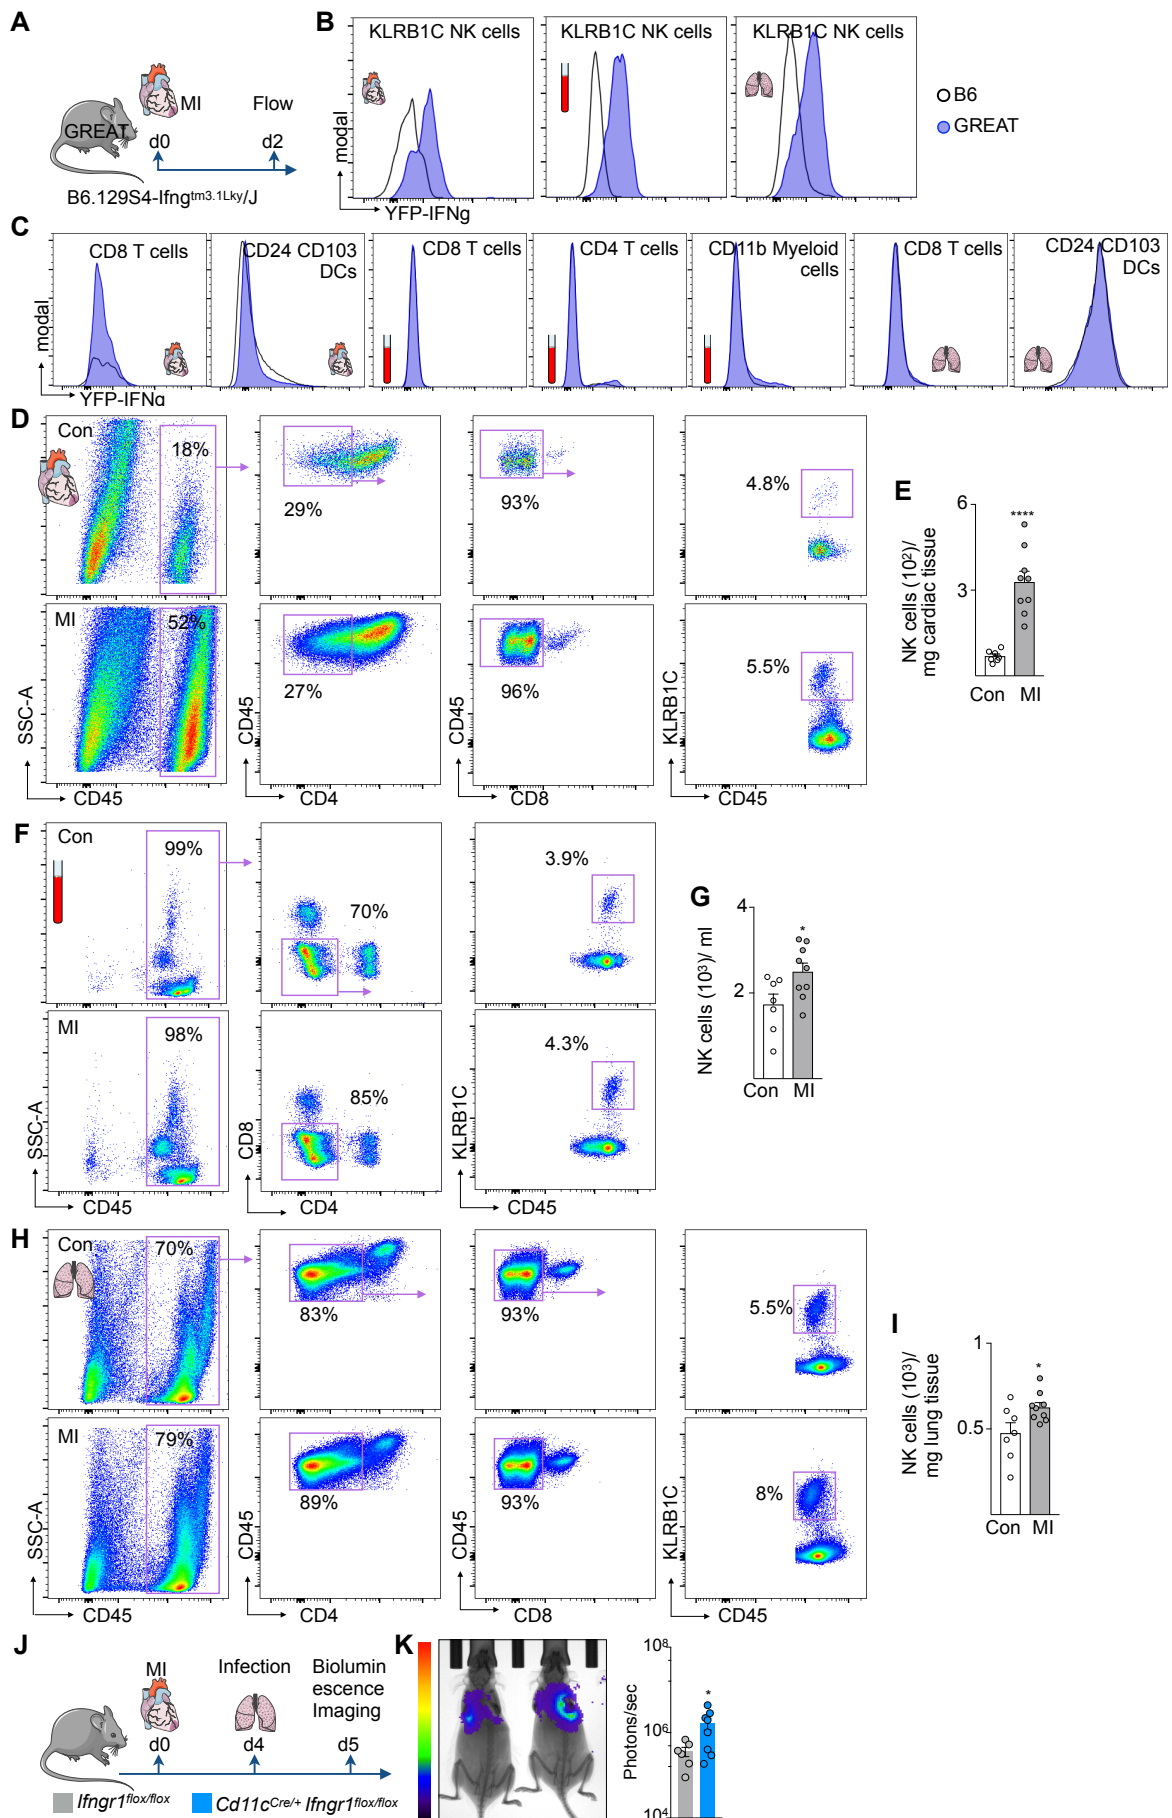

**Figure S6. Disrupted IFN $\gamma$  signaling abrogates lung protection after MI, Related to Figure 5.**

(A,B) IFN $\gamma$  expression of NK cells in heart, blood, and lung in control and YFP-IFN $\gamma$  reporter mice. (C) No change in IFN $\gamma$  expression in indicated cells in heart, blood and lung. (D) Gating and (E) quantification of cardiac NK cells in control mice and on day 4 after MI. Control  $n=7$ , MI  $n=9$ . (F) Gating and (G) quantification of blood NK cells of control mice on day 4 after MI. Control  $n=7$ , MI  $n=9$  biological replicates. (H) Gating and (I) quantification of lung NK cells in control mice and on day 4 after MI. Control  $n=7$ , MI  $n=9$  biological replicates. (J) Bioluminescence/x-ray images and (K) quantification of control and CD11c<sup>Cre</sup> Ifn $\gamma$ <sup>1/flox</sup> mice. Control  $n=6$ , CD11c<sup>Cre</sup> Ifn $\gamma$ <sup>1/flox</sup>  $n=8$ . Data are mean  $\pm$  s.e.m. \* $P<0.05$ , \*\* $P<0.01$ , \*\*\* $P<0.001$ . Unpaired t-test and Welch's t-test were used for statistical analysis.

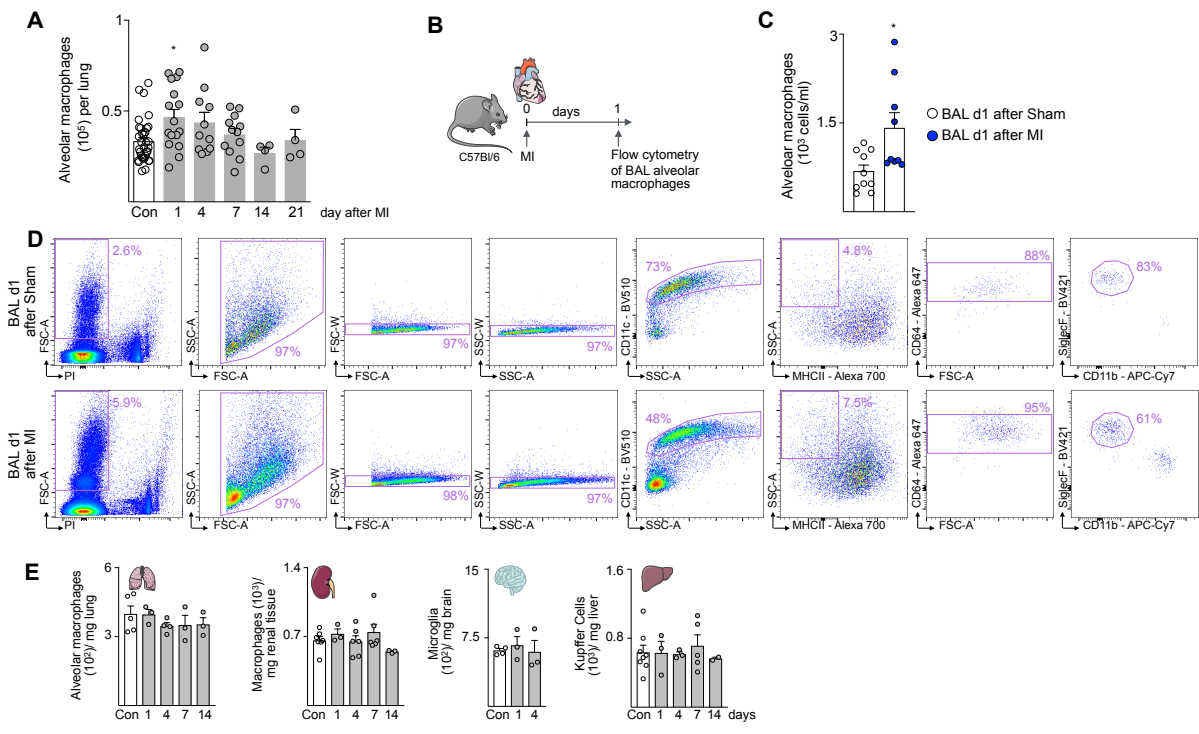

**Figure S7. Macrophage enumeration controls, Related to STAR methods.**

(A) Enumeration of alveolar macrophage numbers expressed per lung after MI. (B-C) Enumeration of alveolar macrophages in the broncho-alveolar lavage on day 1 after MI compared to Sham operated controls. Data are mean±SEM,  $P=0.014$ , two-tailed Mann-Whitney test,  $n=9-10$  mice per group. (E) Macrophage numbers measured by flow cytometry in naive mice and after sham thoracotomy.  $n=4-8$  naive controls,  $n=3-6$  sham thoracotomy.
